# Supplementary material for: Novel in vitro inhibitory functions of potato tuber proteinaceous inhibitors
Source: PubMed Central journal article supplement (PMC4309916; doi:10.1007/s00438-014-0906-5), 2014-09-27
Supplement: 438_2014_906_MOESM2_ESM.pdf [file 438_2014_906_MOESM2_ESM.pdf]

## Molecular and General Genomics

### Novel in Vitro Inhibitory Functions of Potato Tuber Proteinaceous Inhibitors

Matthias Fischer<sup>1</sup>, Markus Kuckenberg<sup>1</sup>, Robin Kastilan<sup>2</sup>, Jost Muth<sup>2</sup>, Christiane Gebhardt<sup>1</sup>

<sup>1</sup>Max-Planck Institute for Plant Breeding Research, Carl von Linné Weg 10, 50829 Cologne, Germany

<sup>2</sup>Fraunhofer Institute for Molecular Biology and Applied Ecology, Forckenbeckstraße 6, 52074 Aachen, Germany

Corresponding author: C. Gebhardt, gebhardt@mpipz.mpg.de

**Supplemental Figure 1: Nucleotide sequences and primers used for expression cloning of 29 potato tuber proteinaceous inhibitors. Borders of the expressed sequences are highlighted grey.**

#### KTI-A type

PI8311

M031-140-1-E22-Eco

AAAGAATTCATGCTACCCAGTGCTAAGTCTGT

M032-140-1-E22-Not

AAAGCGGCCGCGTCTTCGACTTTCTCAAATTCGA

Cacaaatcaaacatgatgacgacgaagtgtttattatctatgtctgtgtttggtcccttgtggtgtttcatcaactttcacttcccaaaatcccattgacc  
taccagtgctaagtctgtcccgtactagacacgacgggtaaagaagtgacctcgttgagttatcgatggttacactaaacggggtccctatg  
gtggtgatatacctagattactcccagggtcaactgcccctgtccagacggcggttccgttacggtcaggtggacctaagggtacaccggtca  
gattgattacacctagtcatttggaccaggtgtgatgatcaagagatcaaatcctcatttccaatgtagaaaagtggttagctataca  
attggaaagtcggaccttacgataatgaagatcgggttccgttttggagacgggccaacaaatagcaagtcagttcaagattgtgaaatcacca  
cgattattgggtacgaattaacttgcgatggtgcattagtggttactatggccagcgtgtggccctgtgagtaacttctcacttgattcgaattga  
gaaagtcgaagactag

PI6033

M011-PI6033-Eco

AAAGAATTCATGGAATCTCCTGTACCTAAGCC

M012-PI6033-Not

AAAGCGGCCGCGACTTCCTGGAATAAGACGTCAA

tacacaaataaaatcaatatgatgaagtgttttttctatgtctatgtttgttctattttggtgtttcatcaactttcacttcccaaaatcccacacactac  
ccagtgaaatcctctgtacctaagccgggtacttgacacaaatggtaaaaactgaatcctaattcgagttatcgattattccacattttggggtgcctta  
ggtggtgatgatacctagaaagtcccaaatcagatgcccctgtccagatggcgattccgttacaattccgatgttgacctagcgggtacacc  
gtagattcattcttattacaaatatcttgaagatcaactacttaacatacaatcaatattccaacagtgaaattgtgtgttagttatacaattggaaa  
gtcggaaaatcaatacacatctatggactatgttggagacgggaggaacatagggaaagcagatagcagctattcaagattgtaaatcatc  
aaaatttgggtacaactattgtattgccctattactgccccctattgtttgctattttgtcgtgatgatgacttctgtgcaaaagtggtgtattcaaa  
atggaaaaaggcgtttggctcttgaacgaaaatcctcttgacgtctattccaggaagctag

PI6137

M011-PI6137-Eco

AAAGAATTCATGGAATCTCCTGTACCTAAGCC

M040-PI6137-Not

AAAGCGGCCGCGACTTCCTGGAATAAGACATCAAGA

atgatgaagtgtttatcttattgtttgtttgtttccaatgtttgtttcatcaactttcacttcccaaaatcccatcaacctaccagtgaaatcctctgtacc  
taagccggactgtgacacaaatggtaaaaaactcaatcctaattcgagttatcgattttccacattttggggtgccttaggtggtgatgtgtacctagg  
aaagccccaaatcagatgcccctgtccagatggtgtattccgttacaattccgatgttgacctaacggtacaccggttagattcattcctttatctac  
aaatatcttgaagatcaactactcaacatacaattcaatattccaacagtgaaattgtgttagttatacaattggaaagtcggtaatctaaatgcac  
atctaaggacgatgtgtggagaccggaggaacctagggcaagcagatagcagctattcaagattgttaaatcatcaaaatgggttacaactta  
ttgattgccctatttctcgccattttctgtccattttgtcgtgatgataacttctgtgcagaagtggtgtagttattcaaaatggaaaaggcggttgctct  
tgtcaacgaaaatcctcttgatgtctattccaggaagtctag

PI9070

M011-PI6137-Eco

AAAGAATTCATGGAATCTCCTGTACCTAAGCC

M040-PI6137-Not

AAAGCGGCCGCGACTTCCTGGAATAAGACATCAAGA

atcaatatgatgaagtgtttatcttattgtttgtttgtttccaatgtttgtttcatcaactttcacttcccaaaatcccatcaacctaccctgtgaaatcctc  
tgtacctaagccggactgtgacacaaatggtaaaaaactcaatcctaattcgagttatcgattttccacattttggggtgccttaggtggtgatgtgta  
cctaggaaagtcccaaatcagatgcccctgtccagatggtgtattccgttacaattccatgttgacctaacggtacaccggttagattcattccttt  
atctacaaatatcttgaagatcaactactcaacatacaattcaatattccaacagtgaaattgtgttagttatacaattggaaagtcggtaatctaaa  
tgcacatctaaggacgatgtgtggagaccggaggaacctagggcaagcagatagcagctattcaagattgttaaatcatcaaaatgggttac  
aacttattgtattgccctatttctcgccattttctgtccattttgtcgtgatgataacttctgtgcagaagtggtgtagttattcaaaatggaaaaggcggtt  
ggctctgtcaacgaaaatcctcttgatgtctattccaggaagtctag

PI0875

M011-PI6137-Eco

AAAGAATTCATGGAATCTCCTGTACCTAAGCC

M040-PI6137-Not

AAAGCGGCCGCGACTTCCTGGAATAAGACATCAAGA

acacaaataataaaatcaatatgatgaagtgtttatcttattgtttgtttgtttccattttgtttgtttcatcaactttcacttcccaaaatcccatcaacc  
taccagtgaaatcctctgtacctaagccggactgtgacacaaatggtaaaaaactcaatcctaattcgagttatcgattttccacattttggggtgcct  
taggtggtgatgtgtacctaggaaagtcccaaatcagatgcccctgtccagatggtgtattccgttacaattccgatgttgacctaacggtacacc  
cgtagattcattcctttatctacaaatatcttgaagatcaactactcaacatacaattcaatattccaacagtgaaattgtgttagttatacaattgga  
aagtcggtaatctaaatgcacatctaaggacgatgtgtggagaccggaggaacctagggcaagcagatagcagctattcaagattgttaaatc  
atcaaaatgggttacaactattgtattgccctatttctcgccattttctgtccattttgtcgtgatgataacttctgtgcagaagtggtgtagttattcaaa  
atggaaaaggcggttgctctgtgcaacaaaatcctcttgatgtctattccaggaagtctaa

PI2850

M011-PI6137-Eco

AAAGAATTCATGGAATCTCCTGTACCTAAGCC

M040-PI6137-Not

AAAGCGGCCGCGACTTCCTGGAATAAGACATCAAGA

Aataaaatcaatatgatgaagtgtttatcttctatgtctgtgtttccattttggtatcttcatcaactttcacttcccaaaatcccatcaacctaccagtg  
aatctcctgtacctaagccggtacttgacacaaatggtaaaaactgaatcctaattcgagttatcgattattccacattttggggtgcgttaggtggt  
gatgtgtacctaggaaagtccccaaatcagatgcccttgtccagatggcatattccggtacaattccgatgttgacctagcgggtacaccggttagat  
tcattcctttatctacaaatatctttgaagatcaactacttaacatacaattcaatattccaacagtgaaattgtgtgttagttatacaattggaaagtcgga  
aatctaaatgcacagctaaggacgacgtgttgagacgggaggaaccataaggcaagcagatagcagctattcaagattgtaaatcattaaaa  
ttggtfacaacttattgtattgccttactcccccttactcccccttcttctgcatctttgtcgatgataactctgtgcaaaagtgggtgtagtattc  
aaaatggaaaaggcgtttggctctgtcaacaaaatcctcttgatgtcttattccaggaagtctag

PI4063

M041-141-1-p9\_Eco

AAAGAATTCATGGATACTACTCCATGTACTCCAGT

M042-141-1-p9\_Not

AAAGCGGCCGCGACTTCCTGGAATAGACATCAAGA

Ttgtttccattttggtgtttcatcaactttcttcccaaaatcccattgacctaccactgatactactccatgtactccagtfacatgacacaaatggaat  
gaactaatcctaattcgattatcgattattccacttttggggtgccttaggggtgatgtgtacctaggaaagtccccaaatcagatgcccttgc  
cagatggcgtattccgttacaattccgatgttgacctagcgggtacaccggttagattcattcctaaatattggagcaaatatgtgaggatcaactact  
caacatacaatcaatattccaacagtgaaattgtgtgttagttatacaattggaaagtggaaatctaaatgcacatccaaggacgatgtgtggag  
acgggaggaaccatagggcaagcagatagcagctattcaagattgctaaatcatcaaaattggttacaacttattgtattgccttactcgcctta  
ttattgtccattttgcatgatgaaaactctgtgcaaaaatgggagtagtattcaaaatggaaaaagcgtttggctctgtcaacgaaaatcctcttga  
tgtctattccaggaagtctag

## KTI-B type

PI4435

M009-140-2-h11-Eco

AAAGAATTCATGCTACCTAGTGATGCTACTCCAGTACTT

M010-140-2-h11-Not

AAAGCGGCCGCGCTGGACTTGCATGAAGGAGAC

aataaaatagtagcttaacaagatgaagtgtttatcttctgtgtttggttccattgtggtgtttcatcaactttcacttcccaaaatccattaac  
ctacctagtgatgctactccagttactgacgtaactggtaaagaactgattctcgtttgagttatcgattattccacattttggggtgcgttaggtggtgat  
gtgtacctaggaagtccccaaactcagatgcccttgtgcaaatggcatattccggtacaattccgatgttgacctagcgggtacaccggttagattca  
ttggtcatctagtcattttggacaaggatctttgaaaatgaactactcaacatccaattgctatttcaacatcgaaattgtgtgttagttatacaattgga  
aagtgggagattacgatcatcttagggacgatgtgttgagactggaggaaccataggtcaagcagatagcagttggttcaagattgtaaatc  
atcacaactgtgttacaacttattgtattgcctgttactagtaacatgattgtccattttcctctgaagatcaattctgttcaaaagtgggtgtagttacca  
aatggaaaaagacgtttggctctgtcaaggacaatcctcttgatgtctcctcatgcaagtccagtaa

PI4587

M009-140-2-h11-Eco

AAAGAATTCATGCTACCTAGTGATGCTACTCCAGTACTT

M023-144-3-i12-Not

AAAGCGGCCGCCTGGACTTGCTTGAAGGAGAC

AcaaataaaaattagtagcttaacaagatgaagtgttatTTTTgtatgTTgtgTTgTtccattgTggtTttcatcaacttccactccaaaaatccatt  
aacctacctagtgatgctactccagctactgacgtagctgtaaagaacttgatctcgtttgagttatcgattattccacttttggggtgcgtaggtggt  
gatgtgtacctaggtaagtcccaaattcagatgcccttgtgcaaatggcatattccgttacaattcggatgtggacctagcggtaacccgtagatt  
cattggtcatctagtcattttggacaaggatctttgaaaatgaactactcaacatccaattgctatttcaacatcgaaaattgtgtgttagttatacaattg  
gaaagtgaggagattacgatgcatctctaggacgatgTTgtgTgagactggaggaaccataggTcaagcagatagcagTggtTcaagattgttaa  
tcatcacgatttggtacaactattgtattgcctgttacaattattgtccatcttgcctgatgatcaattctgttcaaaagttggtgtagttacccaaaatg  
gaaaaagacgTTtgctctgtcaaggacaatcctcttgatgtctccttcaagcaagtcagtaa

PI8234

M027-AAM10743-Eco

AAAGAATTCATGCCAGTACTTGACGTAACTGG

M023-144-3-i12-Not

AAAGCGGCCGCCTGGACTTGCTTGAAGGAGAC

cacaaataaaaattagtagcttaacaagatgaagtgttatTTTTgtatgTTgtgTTgTtccattgTggtTttcatcaacttccactccaaaaatccca  
ttaacctacctagtgatgctactccagctactgacgtaactggtaaagaacttgatcctcgtttgagttatcgattattccacttttggggtgcgtaggtg  
gtgatgtgtacctaggtaagtcccaaattcagatgcccttgtgcaaatggtgtattccgttacaattccgatgttgacctagcggtaacccgtag  
attcattggtcatctagtcattttggacaaggatctttgaagatgaactactcaacatccaattcgctatttcaacatcgaaaatgtgtgttagttataca  
ttgtaaagtgggagattacgatgcatctctaggacgatgTTgtgTgagactggaggaaccataagTcaagcagatagcagTggtTcaagattgtta  
aatcatcacaatttggtacaactattgtattgcctgttactactacaatgactttgccatttctctgatgatcaattctgtttaaagttggtgtagttcac  
caaaatggaaaaagacgTTtgctctgtcaaggacaatcctcttgatgtctccttcaagcaagtcagtaa

PI2112

M027-AAM10743-Eco

AAAGAATTCATGCCAGTACTTGACGTAACTGG

M023-144-3-i12-Not

AAAGCGGCCGCCTGGACTTGCTTGAAGGAGAC

AcaaataaaaattagtagcttaacaagatgaagtgttatTTTTgtatgTTgtgTTgTtccattgTggtTttcatcaacttccactccaaaaatccatt  
aacctacctagtgatgctactccagctactgacgtaactggtaaagaacttgatcctcgtttgagttatcgattattccacttttggggtgcgtaggtggt  
gatgtgtacctaggtaagtcccaaattcagatgcccttgtgcaaatggtgtattccgttacaattccgatgttgacctagcggtaacccgtagatt  
cattggtcatctagtcattttggacaaggatctttgaagatgaactactcaacatccaattcgctatttcaacatcgaaaatgtgtgttagttatacaatt  
ggaaagtgggagattacgatgcatctctaggacgatgTTgtgTgagactggaggaaccataggTcaagcagatagcagTggtTcaagattgttaa  
atcatcacaatttggtacaactattgtattgcctgttactactacaatgactttgccatttctctgatgatcaattctgtttaaagttggtgtagttcacc  
aaaatggaaaaagacgTTtgctctgtcaaggacaatcctcttgatgtctccttcaagcaagtcagtaa

PI2568

M027-AAM10743-Eco

AAAGAATTCATGCCAGTACTTGACGTAACTGG

M023-144-3-i12-Not

AAAGCGGCCGCCTGGACTTGCTTGAAGGAGAC

AaaattagtagcttaacaagatgaagtgttatTTTTgtatgTTTgtgTTTgtccattgTgTgTttcatcaacttcacttcccaaaatcccattaaccta  
cctagtgatgctactccagTactgacgtaactggtaaagaactgatcctcgTTgagttatcgtattattccactTTTTgggTgcgTtaggtgTgTgTg  
tacctaggtaaTgTccccaaattcagatgcccctTgtgcaaatgTgTattccgTtacaattccgTgTggacctagcggTtacaccctgagattcattgT  
ttcatctagTcattTggacaaggtatctTgaagatgaactactcaacatccaattcgctatttcaacatcgaaaatgTgTgTtagttatacaattTgaaa  
gtgggagattacgatgcatctctagggacgatgTgTggagactggaggaacataggtcaagcagatagcagTgTgTcaagattgTaaatcatc  
acaattTgTtacaactattgTattgccctgttactactacaatgactTgTccatttccctctgatgatcaattctgTtTaaaagTgTgTtagTtccaaaaatg  
gaaaaagacgTtTgTctTgtcaaggacaatcctctTgatgTctccttcaagcaagTccagtaa

PI5887

M027-AAM10743-Eco

AAAGAATTCATGCCAGTACTTGACGTAACTGG

M023-144-3-i12-Not

AAAGCGGCCGCCTGGACTTGCTTGAAGGAGAC

AcaaataaaattagtagcttTaaacaagatgaagtgTttatTTTTgtatgTTTgtgTTTgtccattgTgTgTttcatcaacttcacttccgaaaatcccatt  
aacctacctagTgatgctactccagTactgacgtaactggtaaagaactgatcctcgTTgagttatcgtattattccactTTTTgggTgcgTtaggtgTgT  
gatgTgTacttaggtaaTgTccccaaatccagatgcccctTgtgcaaatgTgTattccgTtacaattccgTgTgTggacctagcggTtacaccctTatatt  
cattgTtcatctagTcattTggaccgcatatctTcgaagatgaactactcaacatccaattccgTatttcaacatcgaaaatgTgTgTtagttatacaattTg  
gaaagTgggagattacgatgcatctctagggacgatgTgTggagactggaggaacataggtcaagcagatagcagTgTgTcaagattgTtaaa  
tcatcacgattTgTtacaactattgTattgccctgttacaattattTgTccatctTgccctgatgatcaattctgTtcaaaaagTgTgTtagTtccaaaaatg  
gaaaaagacgTtTgTctTgtcaaggacaatcctctTgatgTctccttcaagcaagTccagtaa

PI8383

M027-AAM10743-Eco

AAAGAATTCATGCCAGTACTTGACGTAACTGG

M023-144-3-i12-Not

AAAGCGGCCGCCTGGACTTGCTTGAAGGAGAC

cacaaataaaattagtagcttTaaacaagatgaagtgTttatTTTTgtatgTTTgtgTTTgtccattgTgTgTttcatcaacttcacttccgaaaatcccatt  
taacctacctagTgatgctactccagTactgacgtaactggtaaagaactgatcctcgTTgagttatcgtattattccactTTTTgggTgcgTtaggtgTgT  
tgatgTgTacttaggtaaTgTccccaaatccagatgcccctTgtgcaaatgTgTattccgTtacaattccgTgTgTggacctagcggTtacaccctTtagat  
tcattgTtcatctagTcattTggaccgcatatctTcgaagatgaactactcaacatccaattccgTatttcaacatcgaaaatgTgTgTtagttatacaattTg  
ggaaagTgggagattacgatgcatctctagggacgatgTgTggagactggaggaacataggtcaagcagatagcagTgTgTcaagattgTtaa  
atcatcacgattTgTtacaactattgTattgccctgttacaattattTgTccatctTgccctgatgatcaattctgTtcaaaaagTgTgTtagTtccaaaaat  
ggaaaaagacgTtTgTctTgtcaaggacaatcctctTgatgTctccttcaagcaagTccagtaa

PI5918

M027-AAM10743-Eco

AAAGAATTCATGCCAGTACTTGACGTAACTGG

M023-144-3-i12-Not

AAAGCGGCCGCCTGGACTTGCTTGAAGGAGAC

Agctttaacaagatgaagtggtttttttgttatggttggttgcctattgtggtgtttcatcaacttcacttcccaaaatcccattaacctacctagtgatg  
ctactccagtagctgacgtaactggtaaagaacttgatcctcgtttgagttatcgattatttccattggttaggggtgcgtaggtggtgatgtgtacctaggt  
aagccccaaattcagatgcccttgtgcaaatggtgtattccgttacaattcggatgttgacactagcggtaaccccgttagattcattggtcatctagt  
cattttggaccgcatacttgaagatgaactactcaacatccaattcgtatttcaacatcgaaattgtgttagttatacaatttgaaagtgggagat  
tacgatgatctctagggacgatgtgttgagactggaggaacataggtcaagcagatagcagttggtcaagattgttaaatacatcacaacttgg  
tacaactattgtattgccatttctctgatgatcaattctgtttaaagtgtgttagttcaccaaaatggaaaagacgtttgctctgttaaggacaat  
cctcttgatgtctcctcaagcaagtcagtaa

PI9142

M009-140-2-h11-Eco

AAAGAATTCATGCTACCTAGTGATGCTACTCCAGTACTT

M023-144-3-i12-Not

AAAGCGGCCGCCTGGACTTGCTTGAAGGAGAC

Acaaataaaattagtagcttaacaagatgaagtggtttttttgttatggttggttgcctattggtgtttcatcaacttcacttccaaaaatcccatt  
aacctacctagtgatgctactccagtagctgacgtagctggtaaagaacttgattctcgtttgagttatcgattatttccactttttggggtgcgtaggtggt  
gatgtgtacctaggtgaagtcaccaaaattcagatgcccttgtgcaaatggcatattccgttacaattcggatgttgacactagcggtaaccccgttatatt  
cattggtcatctagtcattttggacaaggtatctttgaaaaatgaactactcaacatccaatttgcatttcaacatcgaaattgtgttagttatacaattg  
gaaagtgggagattacgatgatctctngggacgatgtgttgagactggaggaacataggtcaagcagatagcagttggtcaagattgttaa  
tcatcacaatttggttacaactattgtattgccctgttactagtagacaatgagttgtccatttctctgatgatcaattctgtttaaagtgtgttagttacca  
aaatggaaaagacgtttgctctgtcaaggacaatcctcttgatgtctcctcaagcaagtcagtaa

PI9007

M009-140-2-h11-Eco

AAAGAATTCATGCTACCTAGTGATGCTACTCCAGTACTT

M023-144-3-i12-Not

AAAGCGGCCGCCTGGACTTGCTTGAAGGAGAC

Acaaataaaattagtagcttaacaagatgaagtggtttttttgttatggttggttgcctattggtgtttcatcaacttcacttccaaaaatcccatt  
aacctacctagtgatgctactccagtagctgacgtagctggtaaagaacttgattctcgtttgagttatcgattatttccactttttggggtgcgtaggtggt  
gatgtgtacctaggtgaagtcaccaaaattcagatgcccttgtgcaaatggcatattccgttacaattcggatgttgacactagcggtaaccccgttagatt  
cattggtcatctagtcattttggacaaggtatctttaaaatgaactactcaacatccaatttgcatttcaacatcgaaattgtgttagttatacaattgg  
aaagtgggagattacgatgatctctagggacgatgtgttgagactggaggaacataggtcaagcagatagcagttggtcaagattgttaa  
atcacaatttggttacaactattgtattgccctgttactagtagacaatgagttgtccatttctctgatgatcaattctgtttaaagtgtgttagttacca  
aatggaaaagacgtttgctctgtcaaggacaatcctcttgatgtctcctcaagcaagtcagtaa

PI9234

M009-140-2-h11-Eco

AAAGAATTCATGCTACCTAGTGATGCTACTCCAGTACTT

M023-144-3-i12-Not

AAAGCGGCCGCCTGGACTTGCTTGAAGGAGAC

Aacaagatgaagtggtttttgtatggttggttccattgtggtgtttcatcaacttcacttccaaaaatcccattaacctacctagtgtgactact  
ccagtacttgacgtagctggtaaagaactgattctcggttgagttatcgattattccacttttggggtgcgtaggtggtgatgtgtacctaggttaagtc  
ccaaattcagatgccctgtgcaaatggcatattccgttacaattcggatggtggacctagcggtagacaccgtagattcattggtcatctagtcatttg  
gacaaggtatctttgaaaatgaactactcaacatccaattgctatttcaacatcgaaattgtgtgttagttatacaattggaaagtgaggattacgat  
catctctagggacgatggttggagactggaggaacctaggtcaagcagatagcagttggttcaagattgttaaatcatcacaattggttacaact  
attgtattgccctgttactagacaatgagttgtccatttccctctgatgatcaattctgtttaaagttggtgtagttcaccaaatggaaaagacggttg  
ctctgtcaaggacaatcctctgtatgtctcctcaagcaagtccagtaa

PI6362

M009-140-2-h11-Eco

AAAGAATTCATGCTACCTAGTGATGCTACTCCAGTACTT

M023-144-3-i12-Not

AAAGCGGCCGCCTGGACTTGCTTGAAGGAGAC

cttaacaagatgaagtggtttttgtatggttggttccattgtggtgtttcatcaacttcacttccaaaaatcccattaacctacctagtgtgct  
actccagtacttgacgtagctggtaaagaactgattctcggttgagttatcgattattccacttttggggtgcgtaggtggtgatgtgtacctaggttaag  
tccccaaattcagatgccctgtgcaaatggcatattccgttacaattcggatggtggacctagcggtagacaccgtagattcattggtcatctagtcatt  
ttggacaaggtatctttgaaaatgaactactcaacatccaattgctatttcaacatcgaaattgtgtgttagttatacaattggaaagtgaggattacg  
atgcatcttagggacgatggttggagactggaggaacctaggtcaagcagatagcagttggttcaagattgttaaatcatcacaattggttaca  
acttattgtattgccctgttactagacaatgagttgtccatttccctctgatgatcaattctgtttaaagttggtgtagttcaccaaatggaaaagacggt  
tggctctgtcaaggacaatcctctgtatgtctcctcaagcaagtccagtaa

**KTI-C type**

PI1410

M033-140-1-k03-eco

AAAGAATTCATGCTTGTACTCCCTGAAGTTTATG

M008-139-2-c11-Not

AAAGCGGCCGCCGCTTGATGAACACAAATG

Atgaagtcgattaatattttgagtttctctgtcttcaagtaccctctttggttgccttgcctgcatcttctacttctgagaatccaattgtcctccccaaact  
tgtcatgatgatgataatcttactccctgaagttatgaccaagatggcaatccgctgaggattggtgagaggtacattattaagaatcctctcctcgg  
ggccggagccgtatacttgacaatattgaaacctcaatgcccaaacgccgttgcagcacatgtcaattcccaattttggaaaaggcagc  
cccgtcgtgtcattcgttaagtcggagtcggattatggtgatggtgctctaatgactgctgtttatatcaagttctttgtaaaacaacaaagttgtgtt  
gacgaaactggttggaaagtaataatgaacagttggtgtaactggtgtaacgtaggaaatgaaaacgacatctcaagatcaagaaaactgac  
ttggtgatacaggtatgaaaaatgtatacaagttactgcattgtccctctcatcttgagtgcataaatatcggcagcaactttaaataatggatctctc  
gtctggtgactgtcaatgacgaanaggactttattccattgtttcatcaaggcgtag

PI5446

M007-139-2-c11-Eco

AAAGAATTCATGCTTGTACTCCCTGAAGTTTATGACC

M008-139-2-c11-Not

AAAGCGGCCGCGCCTTGATGAACACAAATG

Gtcgattaatattttgagttcctcttgccttcaagtaccctctcttgggtgccttgcctcgatctttcacttctgagaatccaattgcctgcccacaacttgcacatgatgatgataatctgtactccctgaagttatgaccaagatggcaatccgctgaggattggtgagaggtacattattaagaatcctctcctcggggccgagccgtatactggacaatattgaaaacctcaatgccccaaacgccgtgttcagcacatgctgattcccccaattttgggaaaaggcagcccgctc atgttcctgtaagtcggagtcggagtcggattatggtgatggtgctgctaatgactgctgtttatatcaagttcttgttaaaaacaacaagatttgcgtt aaagaaactgtttgaaaagtaatgatgaacagttggtgtaactggtgtaacgtaggaaatgaaaacgacatctcaagattatgaaaactgactt ggtgatacggaggtatgaaaaatgtatacaagttactgcattgtccctctcatcttcagtgcataaaatcggcagcaactttaaaaatggatatcctcgt ctggtgactgctgatggtgataaggactttattccatttgtttcatcaaggcgtaa

PI4202

M007-139-2-c11-Eco

AAAGAATTCATGCTTGTACTCCCTGAAGTTTATGACC

M008-139-2-c11-Not

AAAGCGGCCGCGCCTTGATGAACACAAATG

Tcgattaatattttgagttccttcttgccttcaagtaccctctcttgggtgccttgcctcgatctttcacttctgagaatccaattgcctccccacaacttgcacat ataacttgtactccctgaagttatgaccaagatggcaatccgctgaggattggtgagaggtacattattaagaatcctctcctcggggccggagccgt tatactggacaatattgaaaacctcaatgccccaaacgccgtgttacgacacatgctgattcccccaattttgggaaaaggcagcccgctcatgttctc tctgtaagtcggagtcggatgatggtgatggtgctgctaatgactgctgtttatatcaagttcttgttaaaaacaacaagttgtgtgtgacgaaactgtt tggaaagtaatgatgaacagttggtgtaactggtgtaacgtaggaaatgaaaacgacatctcaagatcaagaaaactgacttgggtgatacga ggtatgaaaaatgtatacaagttactgcattgtccctctcatcttcagtgcataaaatcggcagcaactttaaaaatggatatcctcgtctggtgactgt cgtatgacgataaggactttattccatttgtttcatcaaggcgtag

**PIN I**

PI0234

M015-140-2-c2-Eco

AAAGAATTCATGCGAAAAGAATGTGATGG

M016-140-2-c2-Not

AAAGCGGCCGCGACCAACCACAGGCATTGATAC

Atggagtcgaaagttgctcacatcattgtttcttcttcttgcacttcttgaactcttggcaccgaaaagaatgtagaccagaagtcatagaac ttctaaaggaatttgaatgcaatggaaaacaagggtggccagaactattggtgtaccagcacagtagtctaaggggaataattgagaaggaaaata cacttatagctgatgtcagataatactgaatggttctccagtcacagctgatttagttgtaatcgagttcgtattgctgtaaacatcttgattatgctgat caatgcctgtggttggtaa

PI6013

M045-PI6013-EcoRI

AAAGAATTCAGAGATTTGATCAGTGATGGCAT

M046-PI6013-NotI

AAAGCGGCCGCGACCCATACTGGGAGGAATTTG

Aaaatggagggaaagagatgctcaagttatctcatgtgcttgccttcttgccttctgcatcacttttcaatcactgatggcaagagatttgcagtgatg gcatagaagtaacttccagtggaatgaaggcgaatctgtattttgtccaggtgaagctatcatggcctgaactgttgggatgccagcaggat atgcaaaagcaataattgagaaggaaaatccatagttcatgatgttaggcttctacttctggtatggttaagccagctaattatgttggtagatttt tctggtgttgaccttaactcattgttcaaatcctcccagtatgggtag



**PIN II**

PI4434

M028-AAO88244-Eco  
M029-AAO88244-Not

AAAGAATTCATGAAGGCTTGCACTTTAGAATG  
AAAGCGGCCGCCATTGCAGGGTACATATTTGCC

Ttatccatcatggctgttcacaaggaagtaatttcggtgcttacctaactgttcttgattattggtacttgaagcgcgatggagcatgttgatgcaaa  
ggcttgcaacttagaagtggtaactctgggttgggatatgccacggtcagaaggaagtcggaaaacgcataatgcaccaactgttgcaaggtat  
aaaggtgcaattattatagtgcaaatggggttcttgcgaaggagaatctgacccaaaaacccaaatgttgccccgaaattgtgatacaaa  
tattgcctattcaaaatgtctccgttcagaaggaaaatcgctaattatcccaccgaatgtaccacatgctgcacagggatcaaggggtgctactattcg  
gtaaaaatggcaagttgtatgtgaaggagagagtgatgagcccaaggcaaatatgtaccctgcaatgtga

PI6669

M028-AAO88244-Eco  
M029-AAO88244-Not

AAAGAATTCATGAAGGCTTGCACTTTAGAATG  
AAAGCGGCCGCCATTGCAGGGTACATATTTGCC

Ttatccatcatggctgttcacaaggaagtaatttcggtgcttacctaactgttcttgattattggtacttgaagcgcgatggagcatgttgatgcaaa  
ggcttgcaacttagaagtggtaactctgggttgggatatgccacggtcagaaggaagtcggaaaacgcataatgcaccaactgttgcaaggtat  
aaaggtgcaattattatagtgcaaatggggttcttgcgaaggagaatctgacccaaaaacccaaatgttgccccgaaattgtgatacaaa  
tattgcctattcaaaatgtctccgttcagaaggaaaatcgctaattatcccaccgaatgtaccacatgctgcacagggatcaaggggtgctactattcg  
gtaaaaatggcaagttgtatgtgaaggagagagtgatgagcccaaggcaaatatgtaccctgcaatgtga

**Pectin metylesterase inhibitor**

PI7531

M025-136-2-f19-Eco  
M026-136-2-f19-Not

AAAGAATTCATGGCGGGTAACGCC  
AAAGCGGCCGCATGATTTGCAGCATATTGGTT

atggccgcagcgaactgttatttctgcagcactttctctctctctacctctccggcggcgggtaacgccgcagcctctaccagttcataaa  
aagctctgtaaatccactactttcccgatgtatgcgttgcttcccttccggttacgcacaagccattaaaaacagccaattgcagctgggtaaaacg  
gctctgctcgtagcctagataaaagccgaatcgacaaaaggattcgttagcaagctgtgaaattcaagggattgaaaccgagagagatgcagct  
atcaaggttgcgtggaggaaacgaatgatagtgtagatcggttagcagatctgtgaatgagctgaaaggttggatcgtaacctgggaaagcc  
gattccagtgcatatgagtaacgttagagacatgggtaagtgtgctattacagatgagaatacttgcaactgatggattgcccggccgagcttgaat  
ggtaaaattaaggctccattagaagtcacatagctaactagctcaggttactagcaatgcactggccttaataaccaaatatgctgcaaatcattga

## Cyclin dependent kinase inhibitor 2

PI6203

M034-139-2-K16-Pml

AAACACGTGATGGGCAAGTATATGAGGAAGAG

M035-139-2-K16-NotI

AAAGCGGCCGCACGATCTACTTTCACCCATTTGTAA

Ggtgaaatgggcaagtatatgaggaagaggaagacaaaaactactggtgaagttggtgctgtttggatgtaagtctttgggtgttcgtacaagagc  
taaaaccctagctttgaagcaattgcagaaatcgagctccggcgcggtgacagtggatggtgggtgggggatgttatctgcagctgaggagcag  
gaggctggagaaacccggtgggtgtttgaaaggaagacggaacacccttgaaggaatcgaagacagaatcggagttgaggggtgag  
gaagatgaaggggcaatcttgaattctgggtctgtgaggtgaagaggagaagaaggagaagttcatgtacaagaaatcagaaggaaatt  
gacaacaatggcagctttgaaggtgaaaacttgctggaattgatggtagagagaggaccaccaggagagcacacctgcaattgatcagggg  
cccgataacataccaacccctggtccagtacaagacctaacaatgctagtgaagtaacggcagagagccaactcagcgcgaaagaattatc  
ccaacaactcatgaaatgaatgacttcttgctggtacagaagagaagcagcagaaacaattcattgagaagtacaacttgaatccgggtgaacgac  
aagcccctccctggacgttacaatgggtgaaagtagatcggttag

## RNase E inhibitor

PI1479

M036-142-2-L4-Eco

AAAGAATTCATGGCCTTGGTCACCACT

M037-142-2-L4-Not

AAAGCGGCCGCAACACATAGCTCTATTTTAGAAATCAGAA

cgtaggatggcctggcaccactgctgaagttgcatgcaaatccacagcttattgtgagtggtgaactacgggactgcagccaatctcaaat  
atatggcagggcgccaagtcttctgagacctgtgtcactctgaaagtattcgaagacaatgtttggtcgtgagttctcgaggagaaaggtaacggt  
agagtctttagtagcgacgggggtgtagtctaagatgtcaattttgggtggcaaccctgtagtacaagctcaaaacaatggatgggctgggacgt  
agtaaattgctgtgtaagggacgtggacgaaatcaatggctgtgatcggagtcagagctctggctcacatccaatgaaagccaataagaaag  
gtatcggagagaagcacgttccataaccattgccgggactagaatctgcatggtgagtggtcttatgcagataccgatggcattctgattctaaaa  
tagagctatgtttga
